# Supplementary figures and images for: Accelerated cell divisions drive the outgrowth of the regenerating spinal cord in axolotls
Source: eLife journal article supplement (doi:10.7554/elife.20357), 2016-11-25

**A**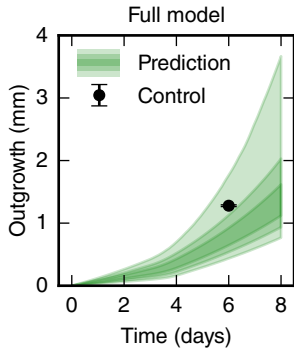**B**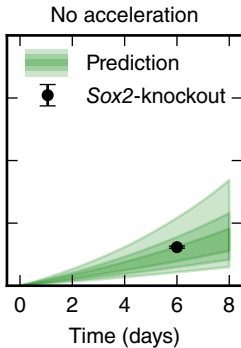

Supplement: supp [file elife-20357-supp-v1.zip]

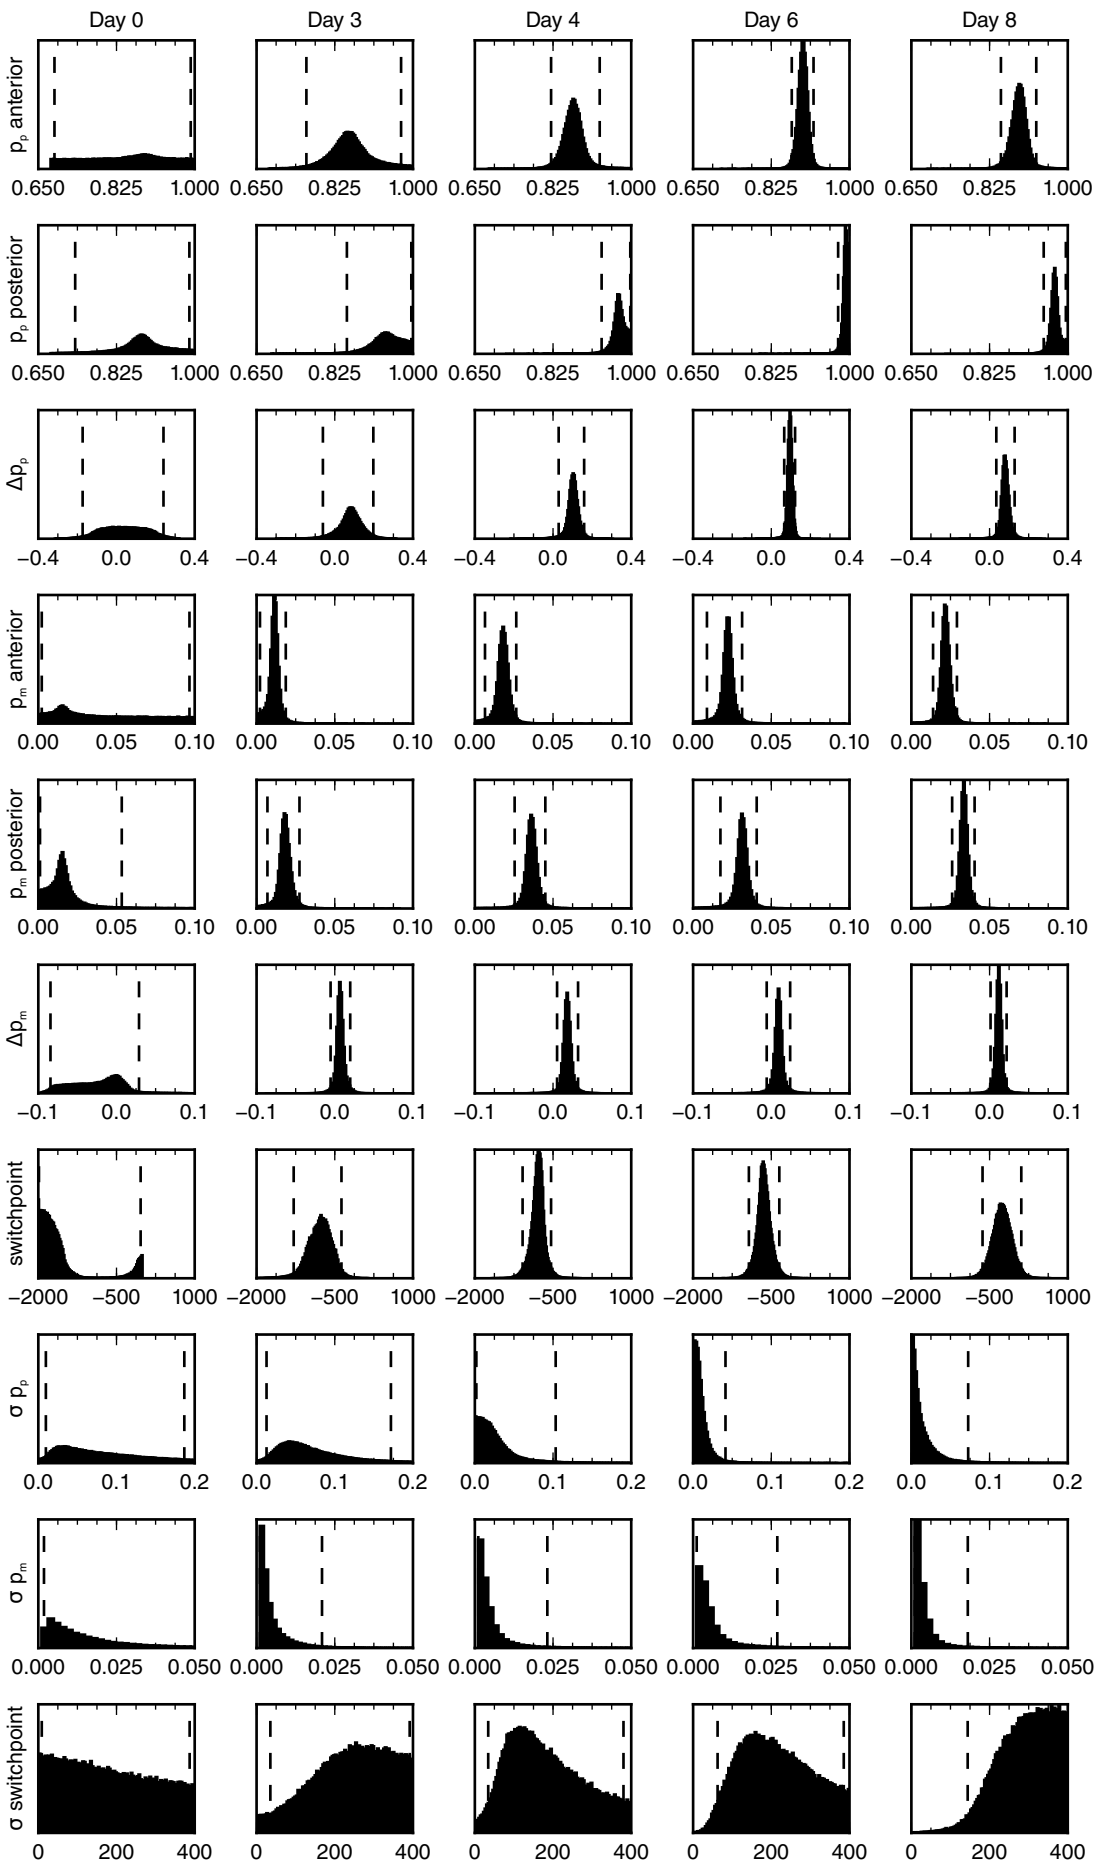

Supplement: supp [file elife-20357-supp-v1.zip]

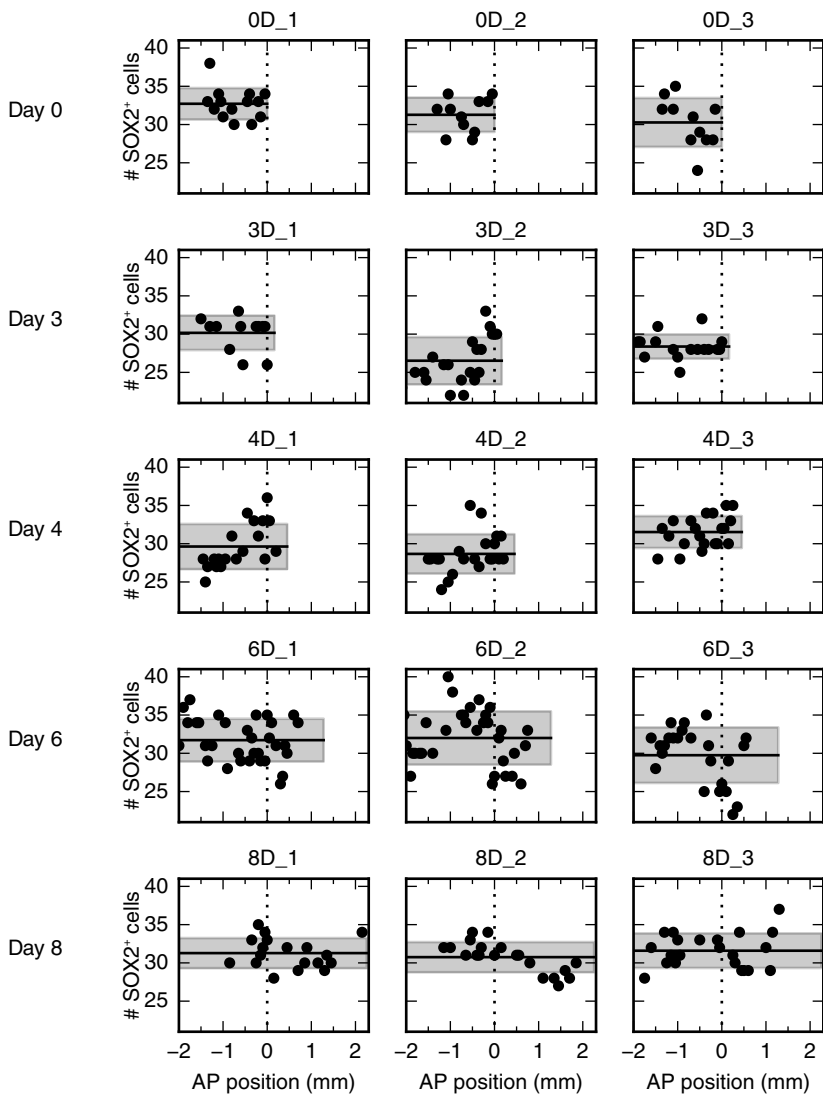

Supplement: supp [file elife-20357-supp-v1.zip]

**A**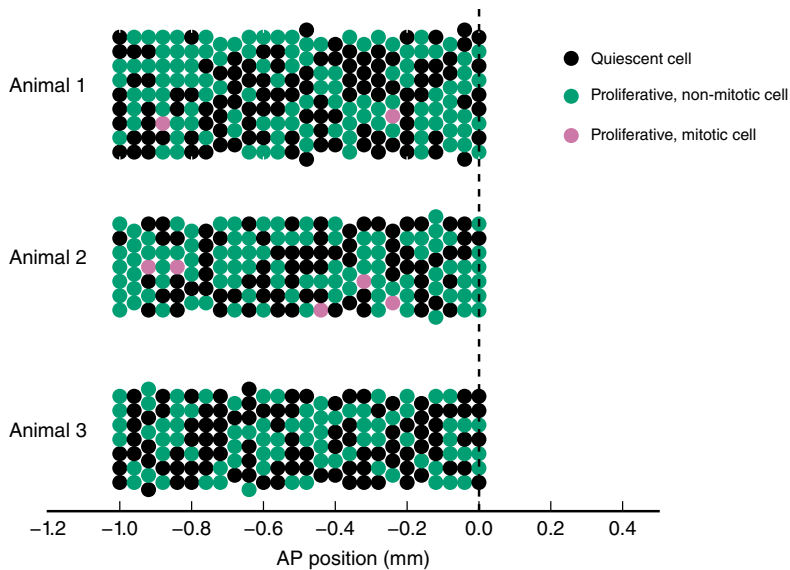**B**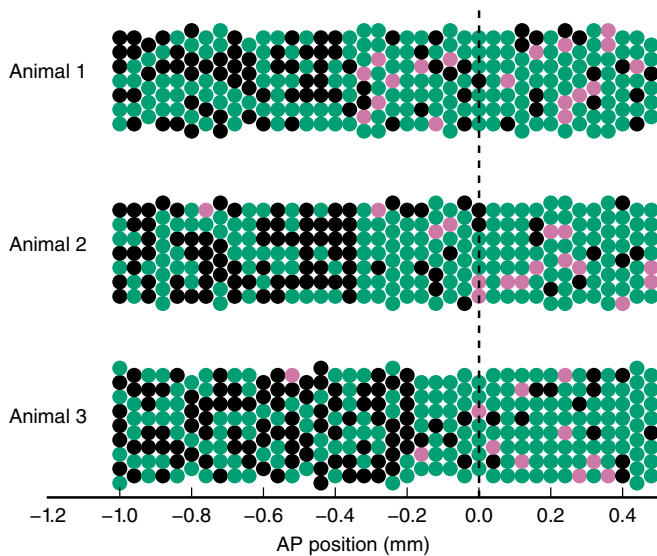

Supplement: supp [file elife-20357-supp-v1.zip]

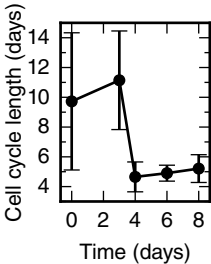

Supplement: supp [file elife-20357-supp-v1.zip]

**A**

No acceleration

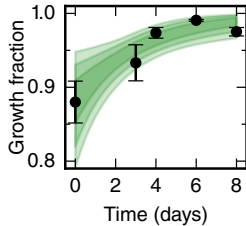**B**

No influx

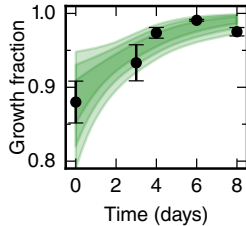**C**

No activation

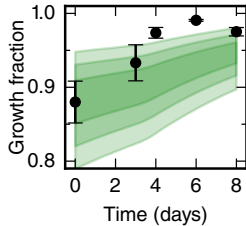**D**

Only acceleration

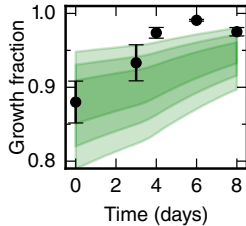

Supplement: supp [file elife-20357-supp-v1.zip]

Day 2

Day 3

Day 4

Day 6

Day 8

Animal t1

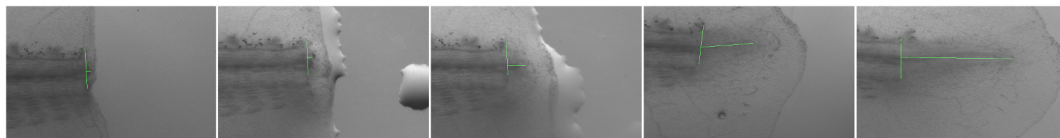

Animal t2

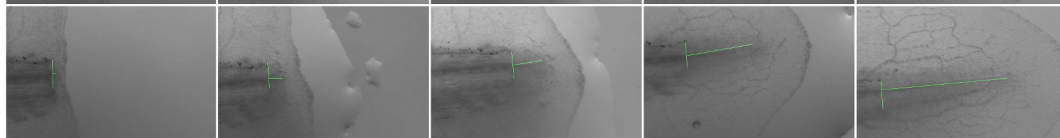

Animal t3

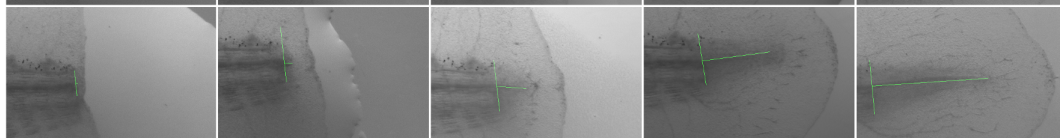

Animal t4

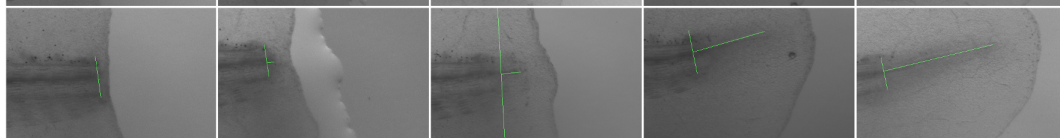

Animal t5

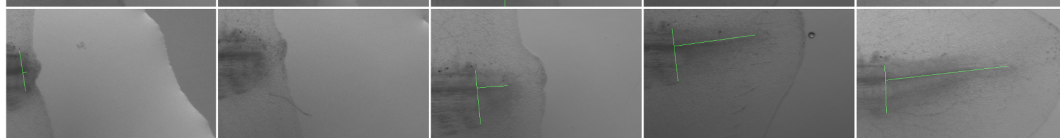

Animal t6

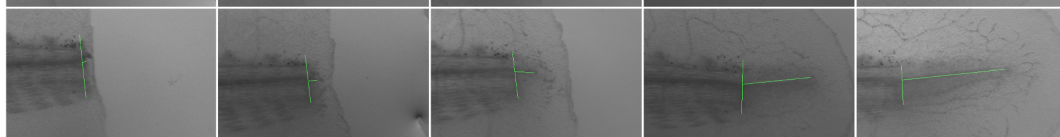

Animal t7

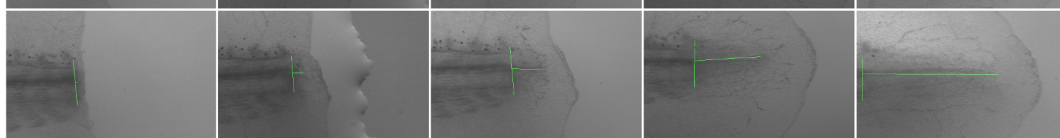

Animal t8

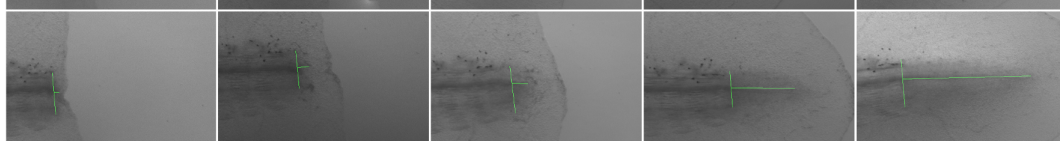

Supplement: supp [file elife-20357-supp-v1.zip]

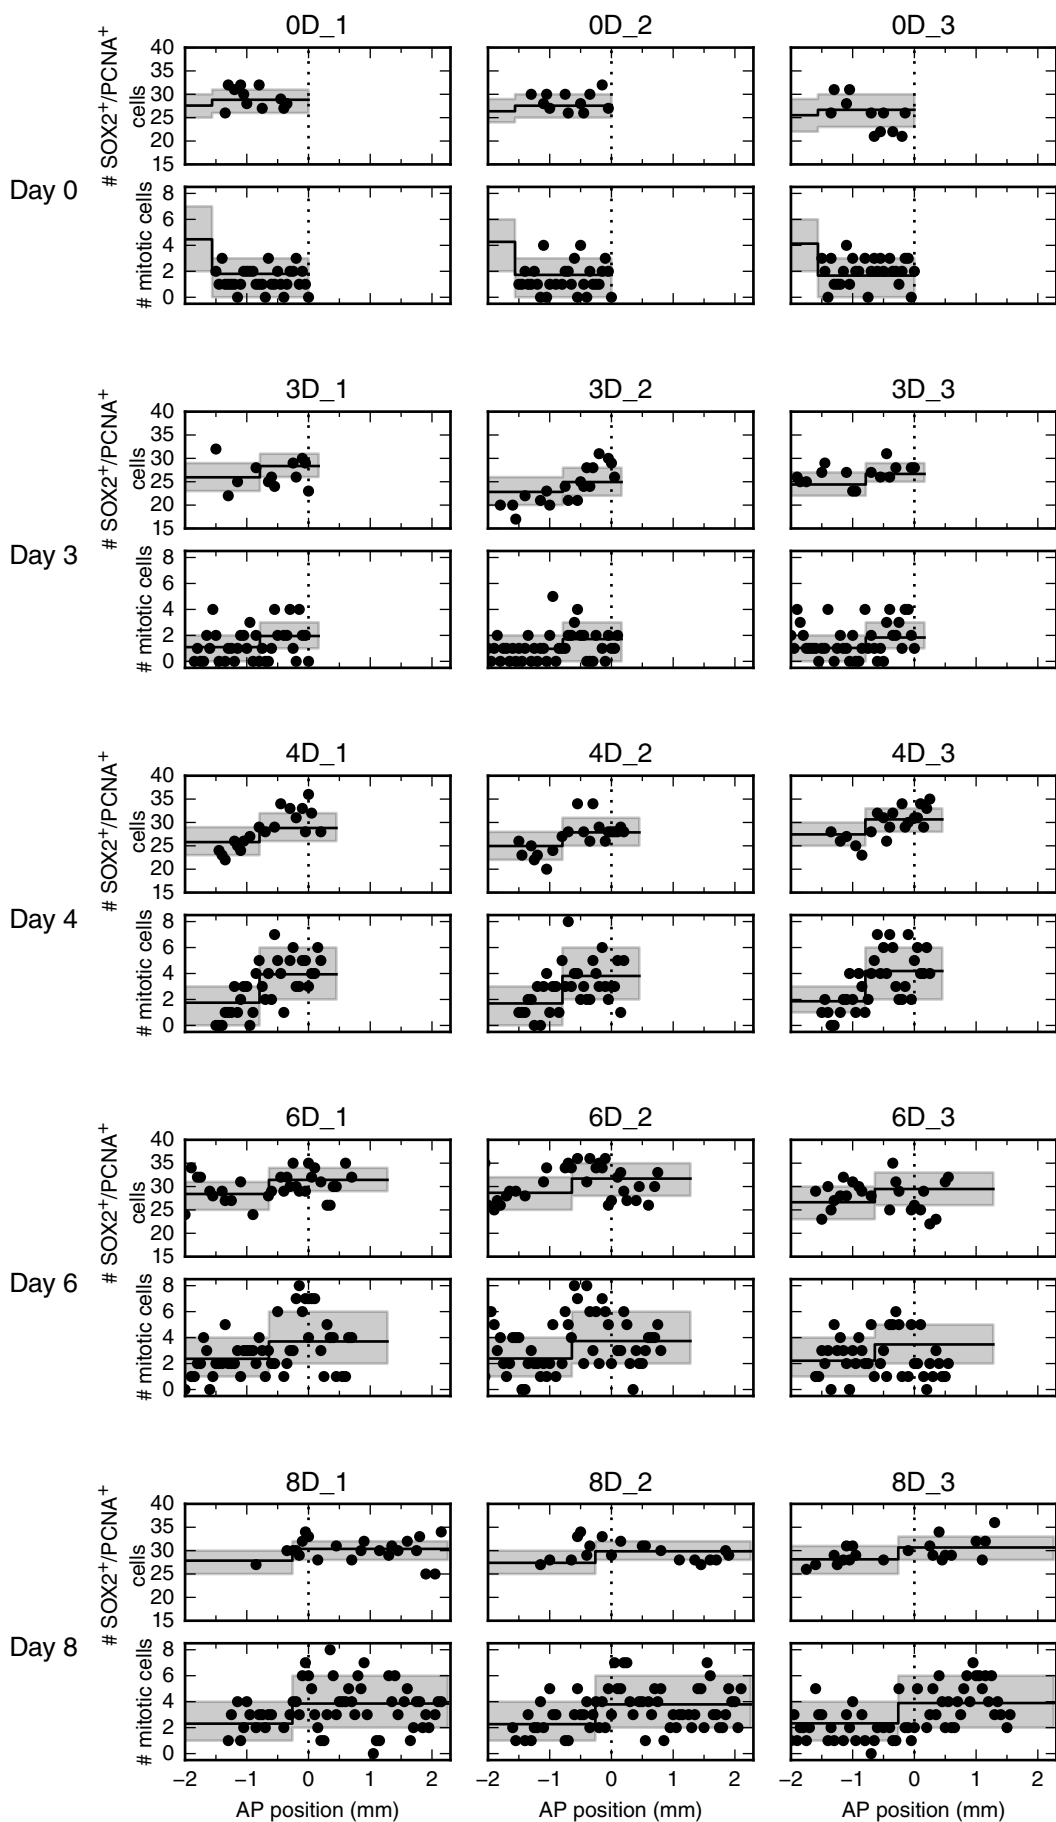

Supplement: supp [file elife-20357-supp-v1.zip]
